# Supplementary material
Source: PubMed Central journal article supplement (PMC6328434)
Supplement: 41388_2018_433_MOESM1_ESM.pdf [file 41388_2018_433_MOESM1_ESM.pdf]

Supplemental Information for

**Vav proteins maintain epithelial traits in breast cancer cells using *miR-200c*-dependent and independent mechanisms**

by

L. Francisco Lorenzo-Martín, Carmen Citterio, Mauricio Menacho-Márquez, Javier Conde, Romain M. Larive, Sonia Rodríguez-Fdez, Ramón García-Escudero, Javier Robles-Valero, Myriam Cuadrado, Isabel Fernández-Pisonero, Mercedes Dosil, María A. Sevilla, María J. Montero, Pedro M. Fernández-Salguero, Jesús M. Paramio, and Xosé R. Bustelo\*

\*To whom correspondence should be addressed. E-mail: [xbustelo@usal.es](mailto:xbustelo@usal.es)

This PDF file includes:

- (1) Supplemental Figures S1 to S6 and legends (pages 2 to 8)
- (2) Supplemental Tables S1 (pages 9 and 11) and S2 (pages 12 and 14)

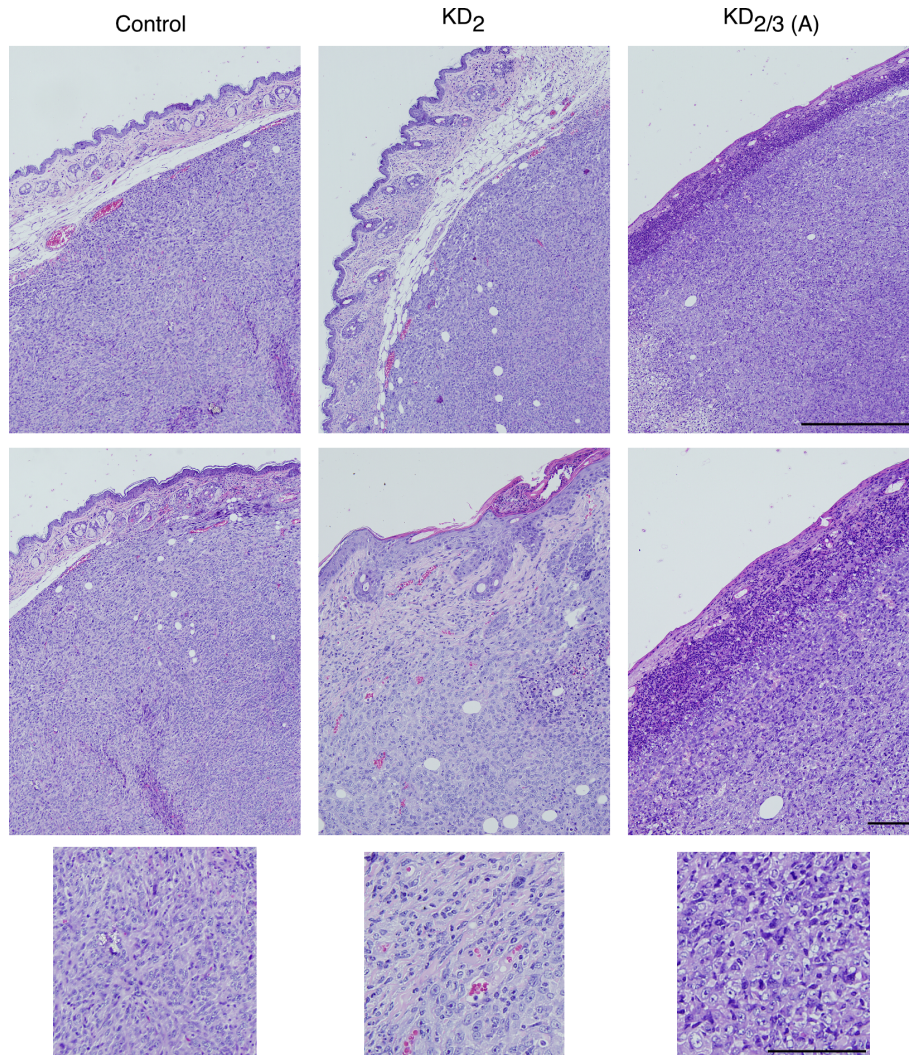

**FIGURE S1. Vav2 and Vav3 are required to maintain epithelial traits in breast cancer cells.** Examples of the histology of tumors derived from the indicated xenografted 4T1 cells. Scale bar, 500 (top panels) and 100 (middle panels)  $\mu\text{m}$ . The bottom panels show 300 x zooms of areas within the middle panels that were made with the software used for figure generation (Canvas Draw 2 for Mac, ACD Systems).

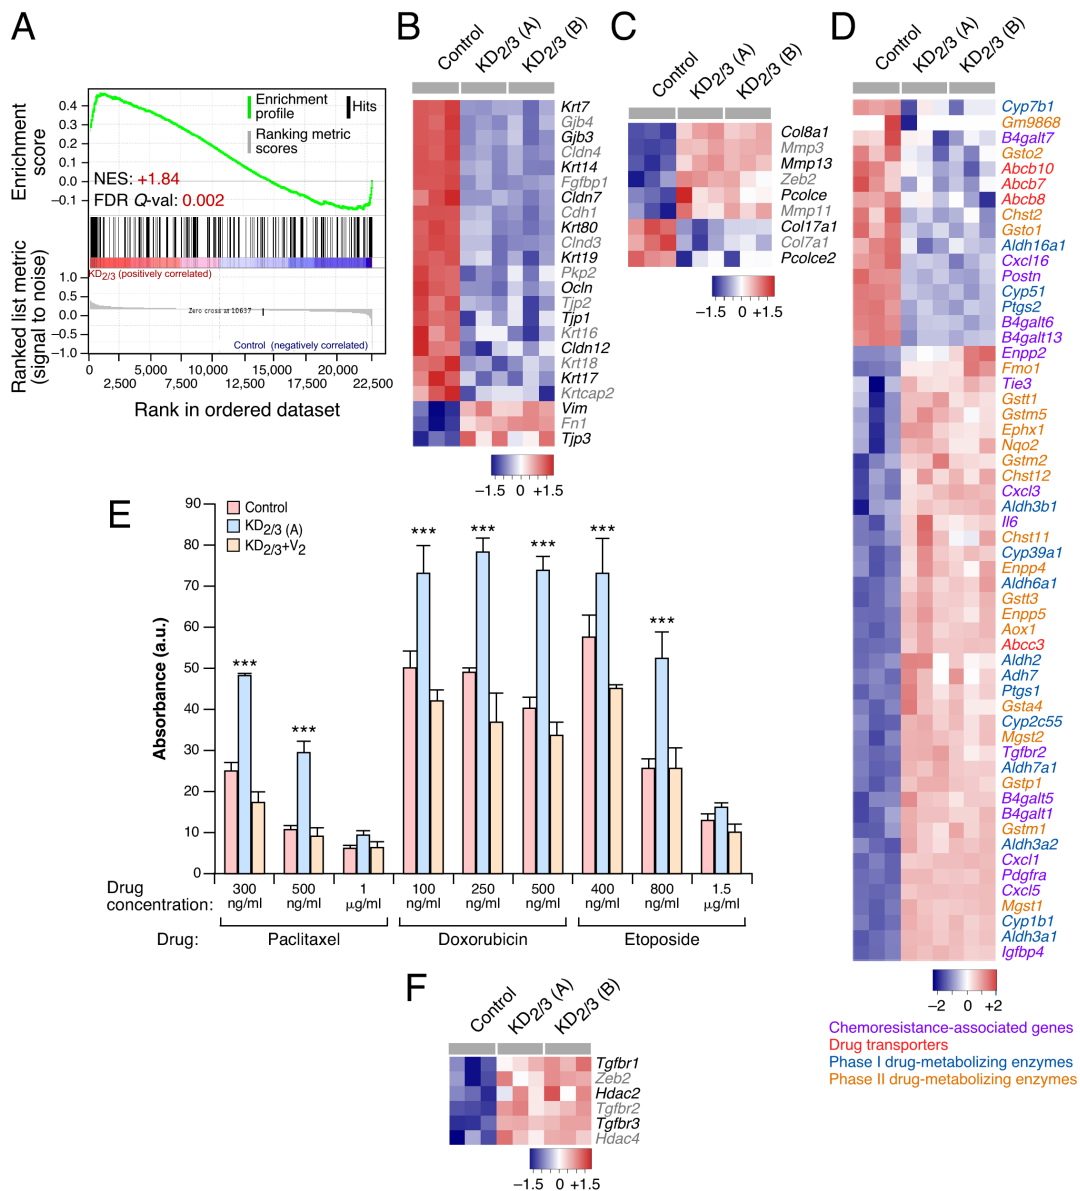

**FIGURE S2. The Vav coding transcriptome and microRNAome are linked to EMT programs. (A)** GSEA showing the overlap of the Vav-regulated 4T1 cell transcriptome with a previously described EMT-associated transcriptome present in MSigDB (see Materials and Methods). The normalized enrichment scores (NES) and false discovery rate values (FDR, using  $q$  values) are indicated inside each GSEA graph.  $Q$ -val,  $q$  value. **(B-D)** Heatmap showing epithelial state- (B), mesenchymal state- (C), and chemoresistance-associated (D) transcripts that are up- (red) and downregulated (blue) in indicated 4T1 cell lines (top). Triplicates for each cell line (columns) are shown. Relative changes in abundance are shown in color gradients according to the scale shown at the bottom. In C, genes are colored according to their role in chemoresistance regulation (bottom). **(E)** Response of 4T1 cell derivatives (inset) to the indicated concentrations of chemotherapy agents (bottom). Values represent the variation relative to untreated cells (which was given an arbitrary value of 100). \*\*\*,  $P \leq 0.001$  ( $n = 3$ ). **(F)** Heatmap of the transcripts encoding EMT regulators that show statistically significant variations between control and two independent clones of KD2/3 cells. 32 additional EMT regulatory factors compiled in previous reviews<sup>11, 26</sup> that show no statistically significant changes in these analyses are not shown. Changes in abundance are plotted as in B.

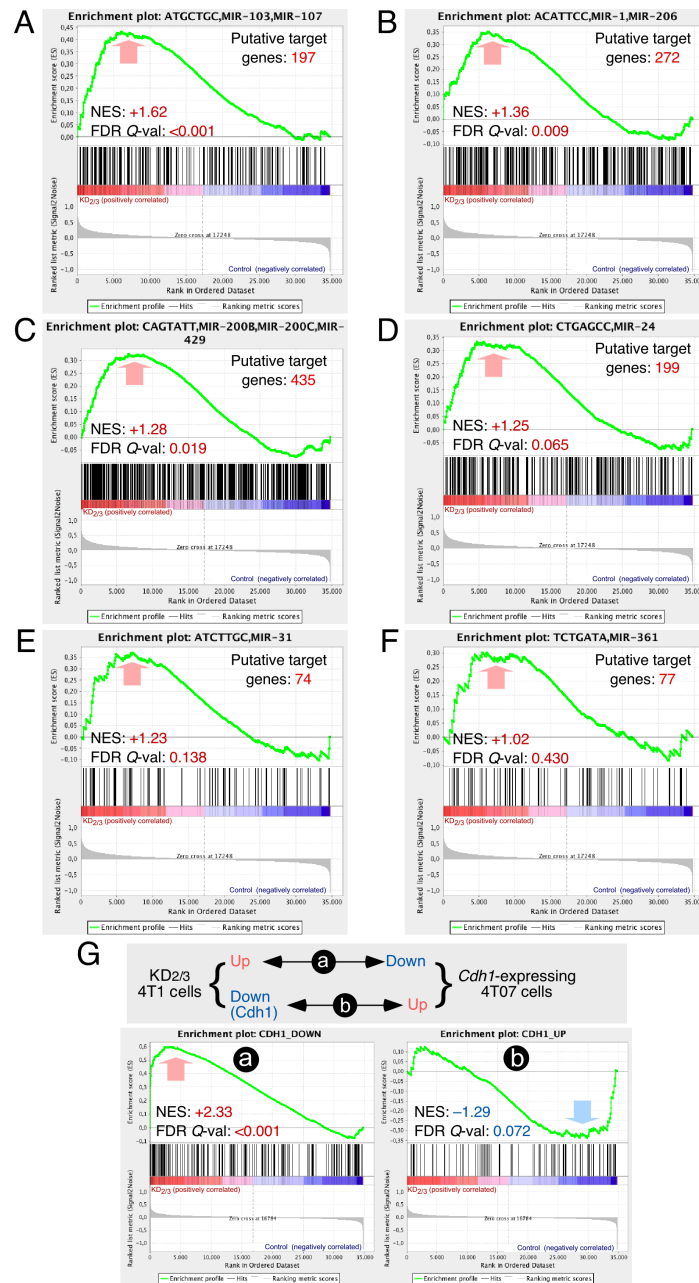

**FIGURE S3. Characterization of the Vav-dependent microRNAome.** (A-F) GSEA showing the percentage of the Vav2;Vav3-dependent coding transcriptome that contains target sequences for *miR-103* (A), *miR-107* (A), *miR-206* (B), *miR-200* family (C), *miR-24* (D), *miR-31* (E), and *miR-361* (F). The NES and FDR values are shown inside each graph as indicated in Fig. S2A. *miR-361* does not reach statistical significance in these analyses. The number of putative transcript targets for each microRNA is indicated in the top right of each panel. Other Vav-regulated microRNAs were not included due to lack of enough information about its target mRNA sequences. (G) Top panel, scheme of the similarities expected according to the mechanistic model proposed in this study. Bottom panels, GSEAs showing the similarities of the transcriptomal subsets indicated in top. The NES and FDR values are shown inside each graph as indicated in Fig. 3B. Red and blue values represent positive and negative correlation between the compared transcriptomes.

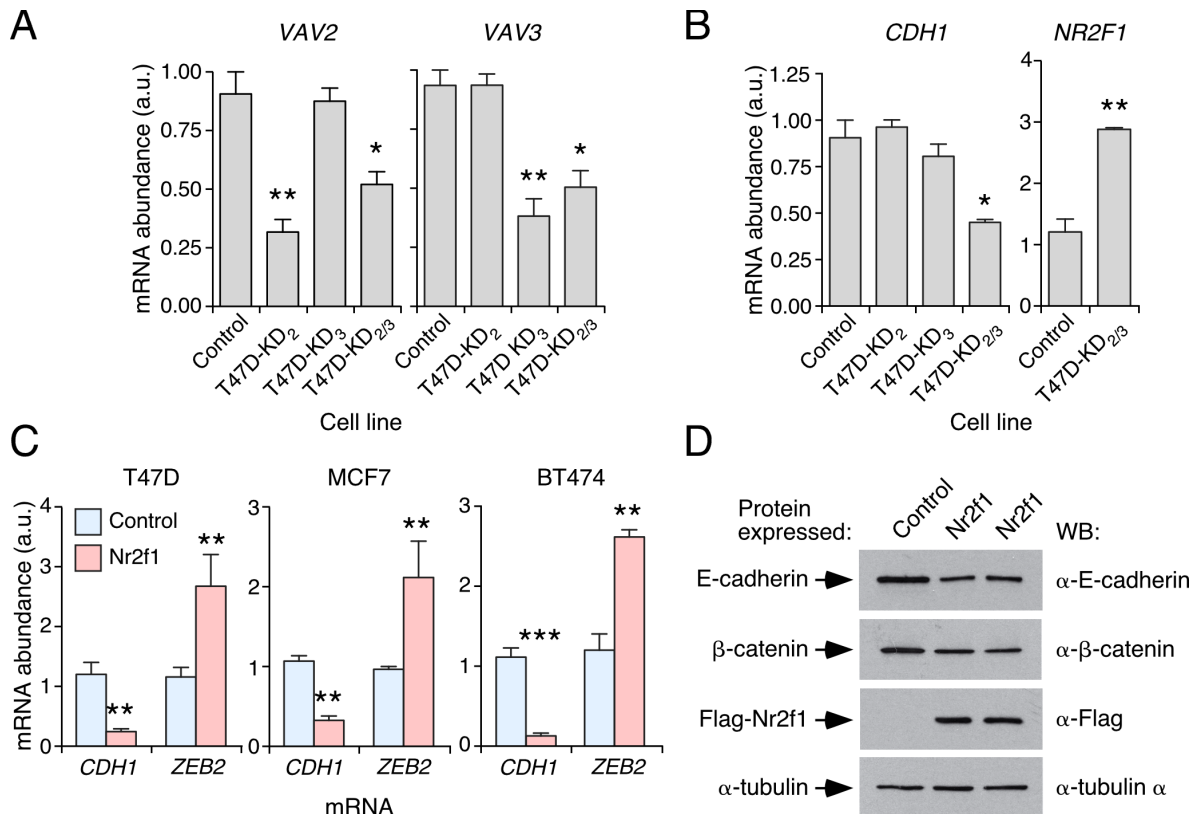

**FIGURE S4. Vav and Nr2f1 proteins negatively regulate E-cadherin in human breast cancer cells. (A)** Abundance of *VAV2* (left panel) and *VAV3* (right panel) mRNAs in control and T47D cell derivatives. \*,  $P \leq 0.05$ ; \*\*,  $P \leq 0.01$  ( $n = 3$ ). **(B)** Abundance of *CDH1* (left) and *NR2F1* (right) transcripts in indicated T47D cells. \*,  $P \leq 0.05$ ; \*\*,  $P \leq 0.01$  ( $n = 3$ ). **(C)** Abundance of indicated transcripts (bottom) upon the transient expression of Nr2f1 in indicated cell lines (top). \*\*,  $P \leq 0.01$ ; \*\*\*,  $P \leq 0.001$  relative to the appropriate control (which was given an arbitrary value of 1) ( $n = 3$ ). **(D)** Expression of indicated proteins (left) in control and two independently sets of T47D cells transiently transfected with Nr2f1. As loading control, we used the abundance of endogenous tubulin  $\alpha$  (bottom panel) ( $n = 2$ ).

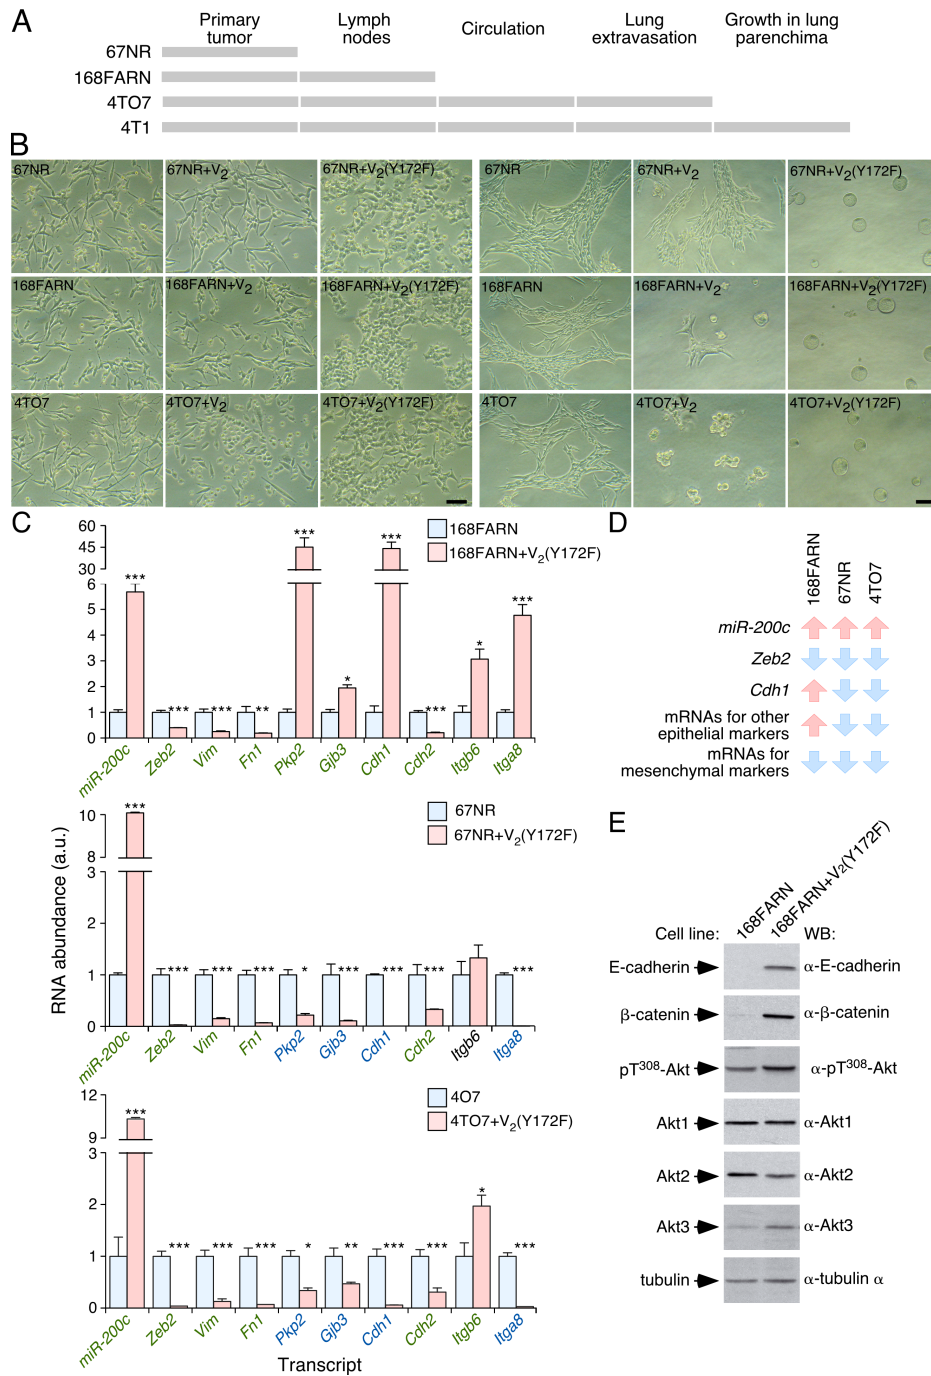

**FIGURE S5. Constitutively active Vav2 triggers MET in mesenchymal breast cancer cells using E-cadherin dependent and independent mechanisms. (A)** Schematic representation of the metastatic defects exhibited by indicated breast cancer cells. Bars depict the metastatic stage in which those cell lines are proficient. **(B)** Representative examples of the morphology of indicated cell lines in 2D (left panels) and 3D (right panels) cultures. Scale bars, 50  $\mu$ m. **(C)** Abundance of *miR-200c* and indicated coding transcripts in 168 FARN (top), 67NR (middle) and 4TO7 (bottom) cells that were transduced with control (light blue) and Vav2<sup>Y172F</sup>-encoding (light red) lentiviral particles (inset). V<sub>2</sub>(Y172F), Vav2<sup>Y172F</sup>. Transcripts with an expected regulation according to the pathway dissected in 4T1 cells are highlighted in green font. Those that show an

unexpected pattern of expression are highlighted in blue font. \*,  $P \leq 0.05$ ; \*\*,  $P \leq 0.01$ ; \*\*\*,  $P \leq 0.001$  ( $n = 3$ ). **(D)** Summary of the results shown obtained in panel C. The cell lines and transcripts are indicated at the top and the left, respectively. Upregulation and downregulation events are depicted as red and blue arrows, respectively. **(E)** Expression of indicated proteins and phospho-proteins (left) in control and Vav2<sup>Y172F</sup>-expressing 168FARN cells. As loading control, we used the abundance of endogenous Akt (fourth panel from top) and tubulin  $\alpha$  (bottom panel) ( $n = 2$ ).

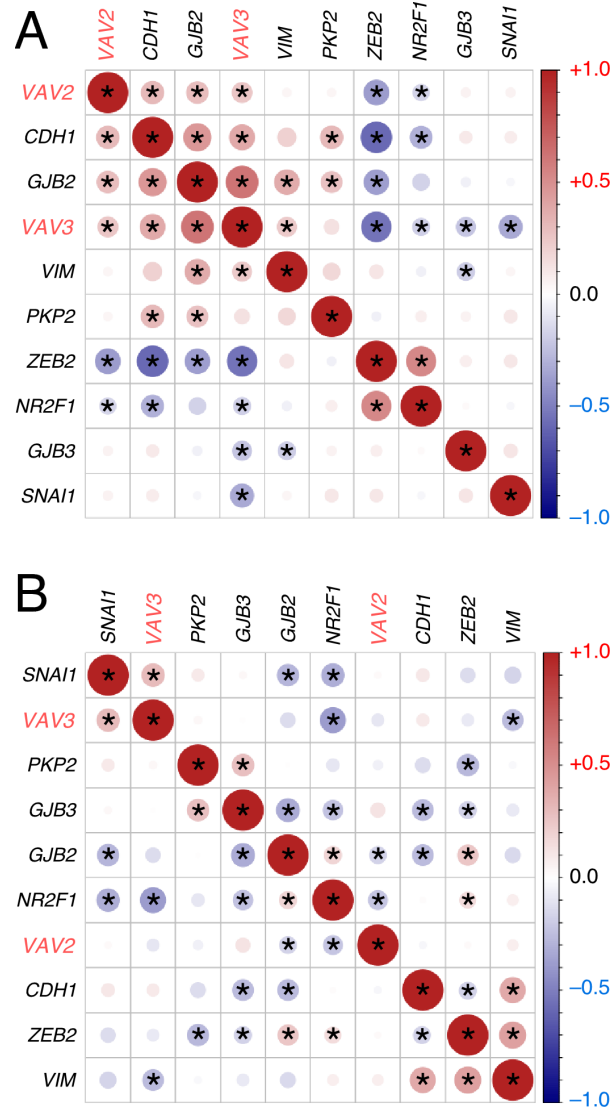

**FIGURE S6. The Vav2-dependent anti-EMT and prometastatic program in human tumors. (A,B)** Expression correlation matrix of indicated transcripts in human luminal (A) and basal (B) breast tumor samples from the GSE65194 microarray dataset. Values are plotted as in Fig. 7A.



**TABLE S1. Cell lines used in this study** (it continues in the next page)

| Cell line                              | Features                                                                                                                                                                                 |
|----------------------------------------|------------------------------------------------------------------------------------------------------------------------------------------------------------------------------------------|
| Control                                | 4T1 cells harboring the empty pLKO.1puro lentiviral vector                                                                                                                               |
| KD <sub>2</sub>                        | A clone (A) of <i>Vav2</i> -deficient 4T1 cells generated by transducing an shRNA-encoding lentivirus                                                                                    |
| KD <sub>3</sub>                        | A clone (A) of <i>Vav3</i> -deficient 4T1 cells generated by transducing an shRNA-encoding lentivirus                                                                                    |
| KD <sub>2/3</sub> (A)                  | A clone (A) of double <i>Vav2</i> ; <i>Vav3</i> -deficient 4T1 cells generated by transducing lentiviral particles each encoding shRNAs to mouse <i>Vav2</i> and <i>Vav3</i> transcripts |
| KD <sub>2/3</sub> (B)                  | A clone (B) of double <i>Vav2</i> ; <i>Vav3</i> -deficient 4T1 cells generated by transducing lentiviral particles each encoding shRNAs to mouse <i>Vav2</i> and <i>Vav3</i> transcripts |
| KD <sub>2/3+ev</sub>                   | KD <sub>2/3</sub> (A) cells harboring an empty pLVX-IRES-Hyg lentiviral vector                                                                                                           |
| KD <sub>2/3+V<sub>2</sub></sub>        | KD <sub>2/3</sub> (A) cells in which an HA-tagged version of wild type Vav2 was re-expressed using lentiviral delivery methods                                                           |
| KD <sub>2/3+V<sub>2</sub>(R373A)</sub> | KD <sub>2/3</sub> (A) cells in which an HA-tagged, catalytically inactive version of Vav2 was re-expressed using lentiviral delivery methods                                             |
| KD <sub>2/3+V<sub>3</sub></sub>        | KD <sub>2/3</sub> (A) cells in which an Myc-tagged version of wild type Vav3 was re-expressed using lentiviral delivery methods                                                          |
| KD <sub>2/3+V<sub>2/3</sub></sub>      | KD <sub>2/3</sub> (A) cells in which the wild type versions of Vav2 (HA-tagged) and Vav3 (Myc-tagged) were re-expressed using lentiviral delivery methods                                |
| KD <sub>2/3+200c</sub>                 | KD <sub>2/3</sub> (A) cells overexpressing miR-200c plus GFP (introduced using lentiviral delivery methods)                                                                              |
| KD <sub>2/3+Rac1<sup>Q61L</sup></sub>  | KD <sub>2/3</sub> (A) cells in which a constitutively active version of Rac1 was stably expressed using lentiviral delivery methods                                                      |

**TABLE S1. Cell lines used in this study** (it continues from previous page)

| Cell line                                | Features                                                                                                                                                                         |
|------------------------------------------|----------------------------------------------------------------------------------------------------------------------------------------------------------------------------------|
| KD <sub>2/3</sub> +Pak1 <sup>T423E</sup> | KD <sub>2/3</sub> (A) cells in which a constitutively active version of Pak1 was stably expressed using lentiviral delivery methods                                              |
| KD <sub>2/3</sub> +PI3K <sup>CAAX</sup>  | KD <sub>2/3</sub> (A) cells in which a constitutively active version of PI3K $\alpha$ (carrying the CAAX box of K-RAS) was stably expressed using lentiviral delivery methods    |
| KD-Raptor                                | A pool of <i>Rptor</i> -deficient 4T1 cells generated by transducing an shRNA-encoding lentivirus                                                                                |
| T47D-KD <sub>2</sub>                     | A pool of <i>VAV2</i> -deficient T47D cells generated by transducing an shRNA-encoding lentivirus                                                                                |
| T47D-KD <sub>3</sub>                     | A pool of <i>VAV3</i> -deficient T47D cells generated by transducing an shRNA-encoding lentivirus                                                                                |
| T47D-KD <sub>2/3</sub>                   | A pool of <i>VAV2</i> ; <i>VAV3</i> -deficient T47D cells generated by transducing an shRNA-encoding lentivirus encoding shRNAs to human <i>VAV2</i> and <i>VAV3</i> transcripts |
| KD-Itgb6                                 | A clone (A) of integrin $\beta 6$ -deficient 4T1 cells generated by transducing an shRNA-encoding lentivirus                                                                     |
| KD-Itga8                                 | A clone (A) of integrin $\alpha 8$ -deficient 4T1 cells generated by transducing a shRNA-encoding lentivirus                                                                     |
| KD-Ilk                                   | A clone (A) of Ilk-deficient 4T1 cells generated by transducing a shRNA-encoding lentivirus                                                                                      |
| KD-Tacstd2                               | A clone of <i>Tacstd2</i> -deficient 4T1 cells generated by transducing an shRNA-encoding lentivirus                                                                             |
| KD-Inhba                                 | A clone of Inhibin $\beta A$ -deficient 4T1 cells generated by transducing an shRNA-encoding lentivirus                                                                          |
| KD-Ptgs2                                 | A clone of cyclo-oxygenase 2-deficient 4T1 cells generated by transducing an shRNA-encoding lentivirus                                                                           |

**TABLE S1. Cell lines used in this study** (it continues from previous pages)

| Cell line                     | Features                                                                                                                       |
|-------------------------------|--------------------------------------------------------------------------------------------------------------------------------|
| 67NR+V <sub>2</sub>           | 67NR cells in which the wild type version of Vav2 (HA-tagged) was overexpressed using lentiviral delivery methods              |
| 67NR+V <sub>2(Y172F)</sub>    | 67NR cells in which a constitutively active version of Vav2 (HA-tagged) was overexpressed using lentiviral delivery methods    |
| 4OT7+V <sub>2</sub>           | 4OT7 cells in which the wild type version of Vav2 (HA-tagged) was overexpressed using lentiviral delivery methods              |
| 4OT7+V <sub>2(Y172F)</sub>    | 4OT7 cells in which a constitutively active version of Vav2 (HA-tagged) was overexpressed using lentiviral delivery methods    |
| 168FARN+V <sub>2</sub>        | 168FARN cells in which the wild type version of Vav2 (HA-tagged) was overexpressed using lentiviral delivery methods           |
| 168FARN+V <sub>2(Y172F)</sub> | 168FARN cells in which a constitutively active version of Vav2 (HA-tagged) was overexpressed using lentiviral delivery methods |

**TABLE S2. List of genes included in the *miR-200c*-Vav-dependent EMT signature (it continues in next pages)**

| Probeset | Gene symbol     | Gene description                                                                             |
|----------|-----------------|----------------------------------------------------------------------------------------------|
| 10355984 | <i>Serpine2</i> | Serine (or cysteine) peptidase inhibitor clade E member 2                                    |
| 10532085 | <i>Tgfbr3</i>   | Transforming growth factor $\beta$ receptor III                                              |
| 10546450 | <i>Adamts9</i>  | A disintegrin-like and metallopeptidase with thrombospondin type 1 motif 9                   |
| 10546432 | <i>Adamts9</i>  | A disintegrin-like and metallopeptidase with thrombospondin type 1 motif 9                   |
| 10522503 | <i>Pdgfra</i>   | Platelet derived growth factor receptor, $\alpha$ polypeptide                                |
| 10594800 | <i>Fam63b</i>   | Family with sequence similarity 63 member B                                                  |
| 10422321 | <i>Dzip1</i>    | DAZ interacting protein 1                                                                    |
| 10546454 | <i>Adamts9</i>  | A disintegrin-like and metallopeptidase (reprolysin type) with thrombospondin type 1 motif 9 |
| 10435271 | <i>Heg1</i>     | HEG homolog 1                                                                                |
| 10606186 | <i>Slc16a2</i>  | Solute carrier family 16 member 2                                                            |
| 10546434 | <i>Adamts9</i>  | A disintegrin-like and metallopeptidase with thrombospondin type 1 motif 9                   |
| 10429160 | <i>St3gall</i>  | ST3 $\beta$ -galactoside $\alpha$ -2,3-sialyltransferase 1                                   |
| 10504424 | <i>Reck</i>     | Reversion-inducing-cysteine-rich protein with kazal motifs                                   |
| 10435266 | <i>Heg1</i>     | HEG homolog 1                                                                                |
| 10585982 | <i>Myo9a</i>    | Myosin ixa                                                                                   |
| 10397966 | <i>Otub2</i>    | OTU domain, ubiquitin aldehyde binding 2                                                     |
| 10585970 | <i>Myo9a</i>    | Myosin IXa                                                                                   |
| 10585956 | <i>Myo9a</i>    | Myosin IXa                                                                                   |
| 10521759 | <i>Slit2</i>    | Slit homolog 2                                                                               |
| 10545974 | <i>Antxr1</i>   | Anthrax toxin receptor 1                                                                     |
| 10585988 | <i>Myo9a</i>    | Myosin IXa                                                                                   |
| 10360764 | <i>Enah</i>     | Enabled homolog                                                                              |
| 10585972 | <i>Myo9a</i>    | Myosin IXa                                                                                   |
| 10398240 | <i>Eml1</i>     | Echinoderm microtubule associated protein like 1                                             |
| 10591816 | <i>Dpy19l1</i>  | Dpy-19-like                                                                                  |
| 10523297 | <i>Ccng2</i>    | Cyclin G2                                                                                    |
| 10574166 | <i>Cpne2</i>    | Copine II                                                                                    |
| 10585986 | <i>Myo9a</i>    | Myosin IXa                                                                                   |
| 10457508 | <i>Npc1</i>     | Niemann Pick type C1                                                                         |
| 10403727 | <i>Gli3</i>     | GLI-Kruppel family member GLI3                                                               |
| 10568785 | <i>Bnip3</i>    | BCL2/adenovirus E1B interacting protein 3                                                    |
| 10585984 | <i>Myo9a</i>    | Myosin IXa                                                                                   |
| 10585980 | <i>Myo9a</i>    | Myosin IXa                                                                                   |
| 10585978 | <i>Myo9a</i>    | Myosin IXa                                                                                   |
| 10585976 | <i>Myo9a</i>    | Myosin IXa                                                                                   |
| 10544885 | <i>Fkbp14</i>   | FK506 binding protein 14                                                                     |
| 10390574 | <i>Fbxl20</i>   | F-box and leucine-rich repeat protein 20                                                     |
| 10446334 | <i>Glcci1</i>   | Glucocorticoid induced transcript 1                                                          |
| 10439798 | <i>Dzip3</i>    | DAZ interacting protein 3                                                                    |
| 10506031 | <i>Nfia</i>     | Nuclear factor I/A                                                                           |
| 10585974 | <i>Myo9a</i>    | Myosin IXa                                                                                   |
| 10478219 | <i>Plcg1</i>    | Phospholipase C- $\gamma$ 1                                                                  |
| 10586039 | <i>Tle3</i>     | Transducin-like enhancer of split 3                                                          |
| 10426611 | <i>Cacnb3</i>   | Calcium channel, voltage-dependent $\beta$ 3 subunit                                         |

**TABLE S2. List of genes included in the *miR-200c*-Vav-dependent EMT signature (it continues from page 12)**

| Probeset | Gene symbol     | Gene description                                                              |
|----------|-----------------|-------------------------------------------------------------------------------|
| 10542740 | <i>Sspn</i>     | Sarcospan                                                                     |
| 10376208 | <i>Gm2a</i>     | GM2 ganglioside activator protein                                             |
| 10370210 | <i>Col6a1</i>   | Collagen type VI $\alpha 1$                                                   |
| 10414269 | <i>Bnip3</i>    | BCL2/adenovirus E1B interacting protein 3                                     |
| 10356339 | <i>Pde6d</i>    | Phosphodiesterase 6D $\delta$                                                 |
| 10462281 | <i>Vldlr</i>    | Very low density lipoprotein receptor                                         |
| 10395103 | <i>Pxdn</i>     | Peroxidasin homolog                                                           |
| 10376950 | <i>Pmp22</i>    | Peripheral myelin protein 22                                                  |
| 10594802 | <i>Fam63b</i>   | Family with sequence similarity 63B                                           |
| 10487392 | <i>Kcnip3</i>   | Kv channel interacting protein 3                                              |
| 10585992 | <i>Myo9a</i>    | Myosin IXa                                                                    |
| 10585990 | <i>Myo9a</i>    | Myosin IXa                                                                    |
| 10584941 | <i>Bace1</i>    | Beta-site APP cleaving enzyme 1                                               |
| 10524436 | <i>Usp30</i>    | Ubiquitin specific peptidase 30                                               |
| 10527101 | <i>Foxk1</i>    | Forkhead box K1                                                               |
| 10546430 | <i>Adams2</i>   | A disintegrin-like and metallopeptidase with thrombospondin type 1 motif 9    |
| 10483698 | <i>Wipfl</i>    | WAS/WASL interacting protein family, member 1                                 |
| 10420823 | <i>Hmbox1</i>   | Homeobox containing 1                                                         |
| 10592734 | <i>Cbl</i>      | Casitas B-lineage lymphoma                                                    |
| 10531796 | <i>Wdfy3</i>    | WD repeat and FYVE domain containing 3                                        |
| 10452613 | <i>Arhgap28</i> | Rho GTPase activating protein 28                                              |
| 10537353 | <i>Ttc26</i>    | Tetratricopeptide repeat domain 26                                            |
| 10483865 | <i>Fkbp7</i>    | FK506 binding protein 7                                                       |
| 10592719 | <i>Oaf</i>      | OAF homolog                                                                   |
| 10458843 | <i>Sema6a</i>   | Semaphorin 6A                                                                 |
| 10451613 | <i>Foxp4</i>    | Forkhead box P4                                                               |
| 10516427 | <i>Ncdn</i>     | Neurochondrin                                                                 |
| 10593384 | <i>Dixdc1</i>   | DIX domain containing 1                                                       |
| 10378988 | <i>Phf12</i>    | PHD finger protein 12                                                         |
| 10542738 | <i>Rassf8</i>   | Ras association family member 8                                               |
| 10358816 | <i>Lamc1</i>    | Laminin $\gamma 1$                                                            |
| 10547597 | <i>Phc1</i>     | Polyhomeotic-like 1                                                           |
| 10549361 | <i>Tm7sf3</i>   | Transmembrane 7 superfamily member 3                                          |
| 10440849 | <i>Synj1</i>    | Synaptojanin 1                                                                |
| 10572786 | <i>Ap1m1</i>    | Adaptor-related protein complex AP-1 $\mu 1$                                  |
| 10535883 | <i>Katnal1</i>  | Katanin p60 subunit A-like 1                                                  |
| 10426798 | <i>Smardc1</i>  | SWI/SNF related, matrix associated, actin dependent regulator of chromatin D1 |
| 10390022 | <i>Rsad1</i>    | Radical S-adenosyl methionine domain containing 1                             |
| 10575120 | <i>Sntb2</i>    | Syntrophin basic 2                                                            |
| 10582874 | <i>Sp110</i>    | Sp110 nuclear body protein                                                    |
| 10496387 | <i>Dnajb14</i>  | Dnaj (Hsp40) homolog B14                                                      |
| 10380477 | <i>Ppp1r9b</i>  | Protein phosphatase 1 regulatory subunit 9B                                   |

**TABLE S2. List of genes included in the *miR-200c*-Vav-dependent EMT signature** (it continues from pages 12 and 13)

| Probeset | Gene symbol    | Gene description                                                           |
|----------|----------------|----------------------------------------------------------------------------|
| 10370510 | <i>Syde1</i>   | Synapse defective 1 Rho GTPase homolog 1                                   |
| 10586458 | <i>Csnk1g1</i> | Casein kinase 1- $\gamma$ 1                                                |
| 10376690 | <i>Lgl1</i>    | Lethal giant larvae homolog 1                                              |
| 10486595 | <i>Tbk2</i>    | Tau tubulin kinase 2                                                       |
| 10401637 | <i>Nek9</i>    | NIMA (never in mitosis gene $\alpha$ )-related expressed kinase 9          |
| 10436372 | <i>Dcbl2</i>   | Discoidin, CUB and LCCL domain containing 2                                |
| 10375103 | <i>Fbxw11</i>  | F-box and WD-40 domain protein 11                                          |
| 10546452 | <i>Adams9</i>  | A disintegrin-like and metallopeptidase with thrombospondin type 1 motif 9 |
| 10345715 | <i>Map4k4</i>  | Mitogen-activated protein kinase kinase kinase kinase 4                    |
| 10400515 | <i>Sec23a</i>  | Sec23a                                                                     |
| 10495896 | <i>Camk2d</i>  | Calcium/calmodulin-dependent protein kinase II $\delta$                    |
| 10468992 | <i>Frmd4a</i>  | FERM domain containing 4A                                                  |
| 10361055 | <i>Vash2</i>   | Vasohibin 2                                                                |
| 10444268 | <i>Tap2</i>    | Transporter 2 ATP-binding cassette sub-family B                            |
| 10428857 | <i>Mtss1</i>   | Metastasis suppressor 1                                                    |
| 10496324 | <i>Slc39a8</i> | Solute carrier family 39 member 8                                          |
| 10353272 | <i>Stau2</i>   | Staufen homolog 2                                                          |
| 10417095 | <i>Farp1</i>   | FERM, RhoGEF and pleckstrin domain protein 1                               |
| 10469475 | <i>Mllt10</i>  | Myeloid/lymphoid or mixed-lineage leukemia 10                              |
| 10505030 | <i>Fsd11</i>   | Fibronectin type III and SPRY domain containing 1-like                     |
| 10511446 | <i>Asph</i>    | Aspartate- $\beta$ -hydroxylase                                            |
| 10569134 | <i>Deaf1</i>   | Deformed epidermal autoregulatory factor 1                                 |
| 10527012 | <i>Lfng</i>    | LFNG O-fucosylpeptide 3- $\beta$ -N-acetylglucosaminyltransferase          |
| 10425354 | <i>Mgat3</i>   | Mannoside acetylglucosaminyltransferase 3                                  |
